# Supplementary material for: Electrochemical oxidation of 5-hydroxymethylfurfural over a molybdenum sulfide modified nickel-based catalyst
Source: Royal Society of Chemistry journal article supplement (doi:10.1039/d3ma00104k), 2023-01-01
Supplement: d3ma00104k1.pdf [file d3ma00104k1.pdf]

## Supporting Information

### Electrochemical oxidation of 5-hydroxymethylfurfural over molybdenum sulfide modified nickel-based catalyst

Zijia Li<sup>a</sup>, Yingyi Han<sup>a</sup>, Baobing Huang<sup>\*b</sup>, Zilai Xie<sup>a</sup>, Qiao-Hua Wei<sup>\*a</sup>

*a*Fujian Key Laboratory of Electrochemical Energy Storage Materials, College of Chemistry, Fuzhou University, 2 Xueyuan Road, Fuzhou 350016

*b*School of Advanced Manufacturing, Fuzhou University, 1 Shuicheng Road, Jinjiang 362200

Corresponding authors. E-mails: qhw76@fzu.edu.cn

**Table S1.** Element distribution of Ni-MoS<sub>x</sub>/NF obtained from EDS.

| Sample                  | element | Mass percentage |
|-------------------------|---------|-----------------|
| Ni-MoS <sub>x</sub> /NF | Mo      | 40.04%          |
|                         | O       | 34.57%          |
|                         | Ni      | 15.31%          |
|                         | S       | 10.08%          |

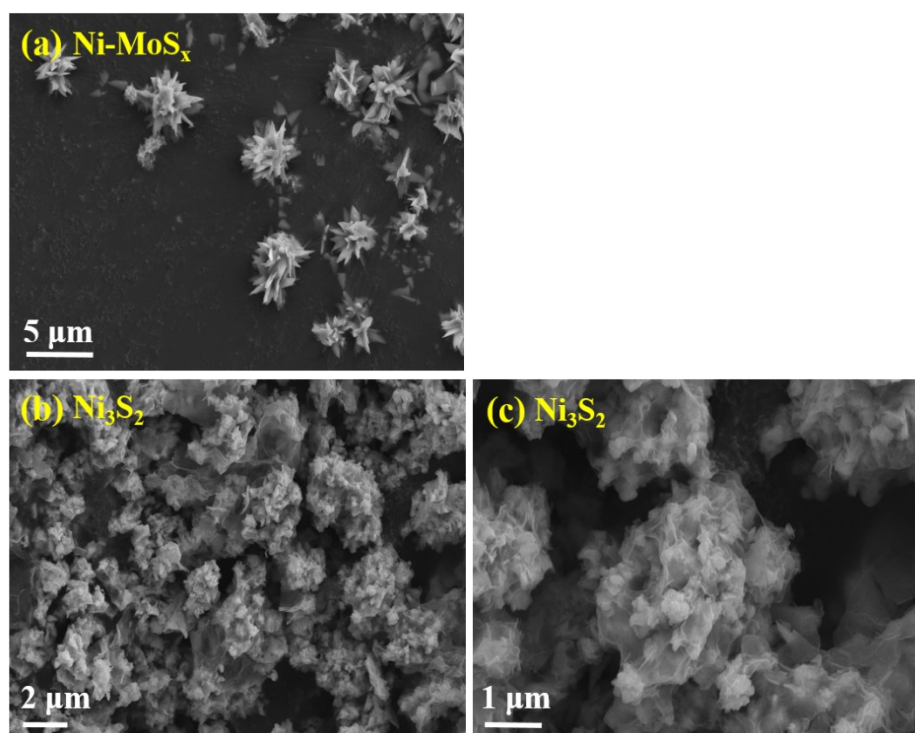

**Figure S1.** SEM images of Ni-MoS<sub>x</sub>/NF(a) and Ni<sub>3</sub>S<sub>2</sub>/NF (b-c).

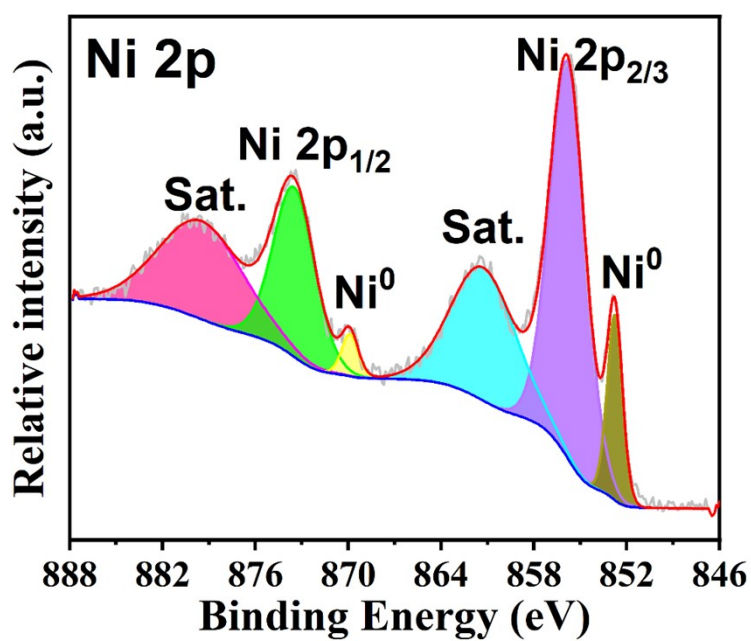

**Figure S2.** The spectra of Ni 2p of the Ni<sub>3</sub>S<sub>2</sub>/NF

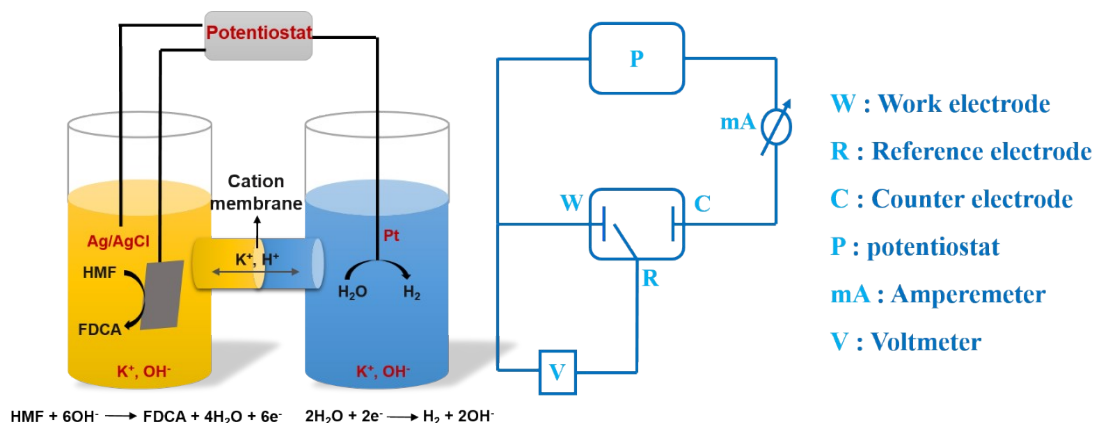

**Figure S3.** Schematic diagram of the electrochemical system used for HMF oxidation with cathode and anode cell reactions.

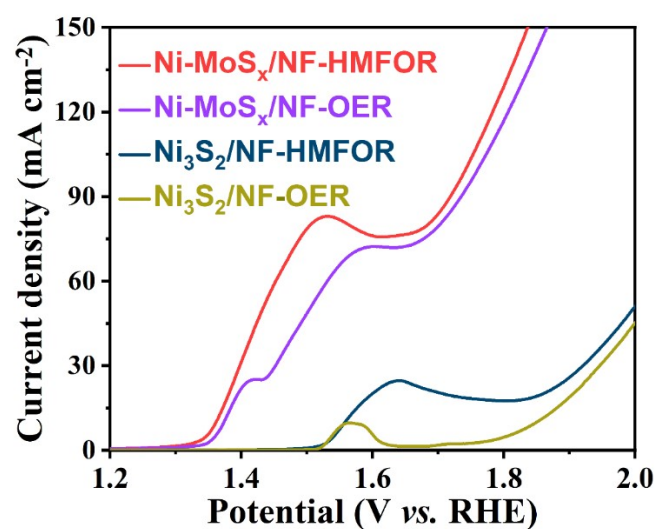

**Figure S4.** LSV curves of Ni-MoS<sub>x</sub>/NF and Ni<sub>3</sub>S<sub>2</sub>/NF with and without 10 mM HMF.

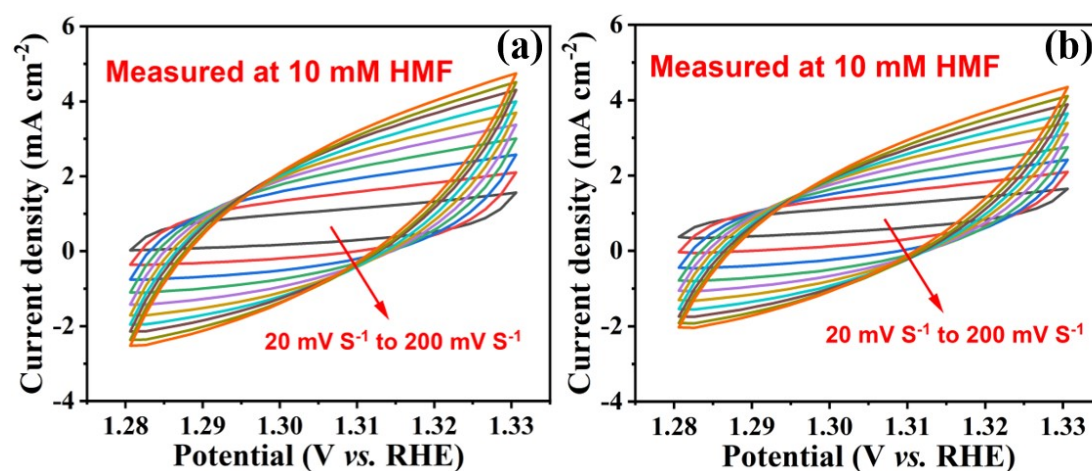

**Figure S5.** CVs of Ni-MoS<sub>x</sub>/NF(a) and Ni<sub>3</sub>S<sub>2</sub>/NF(b) in the non-faradaic capacitance current range at scan rates of 20-200 mV/s.

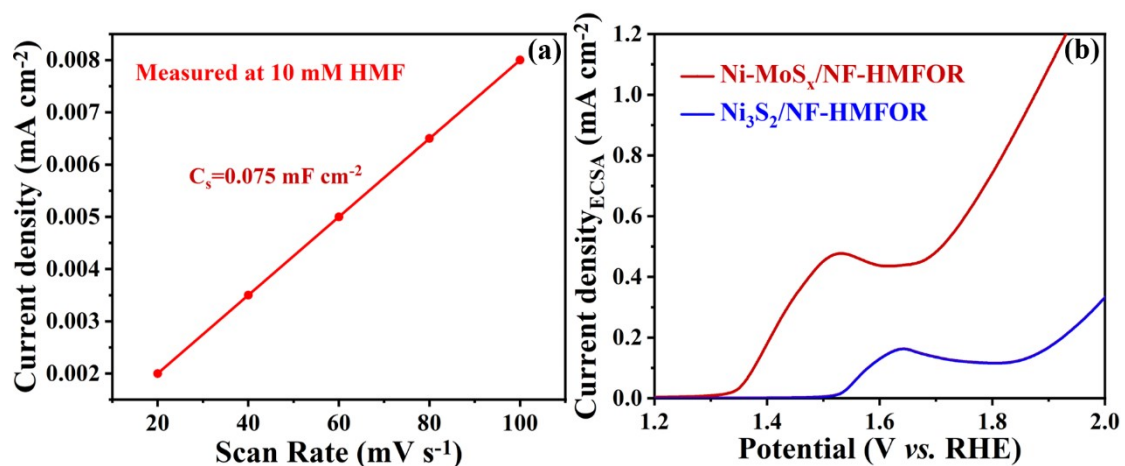

**Figure S6.** (a)  $C_s$  values were obtained using blank nickel foam. (b) The ECSA normalized polarization curves.

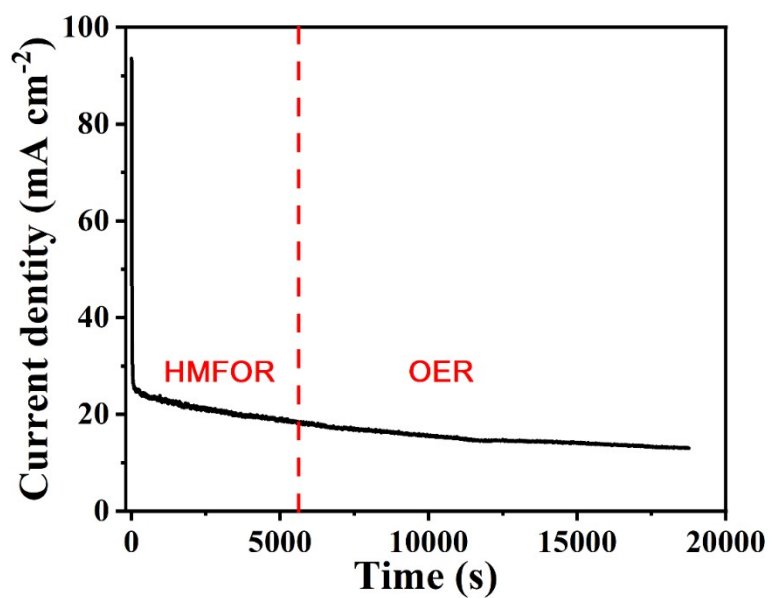

**Figure S7.** Current density–time curve in the process of reaction.

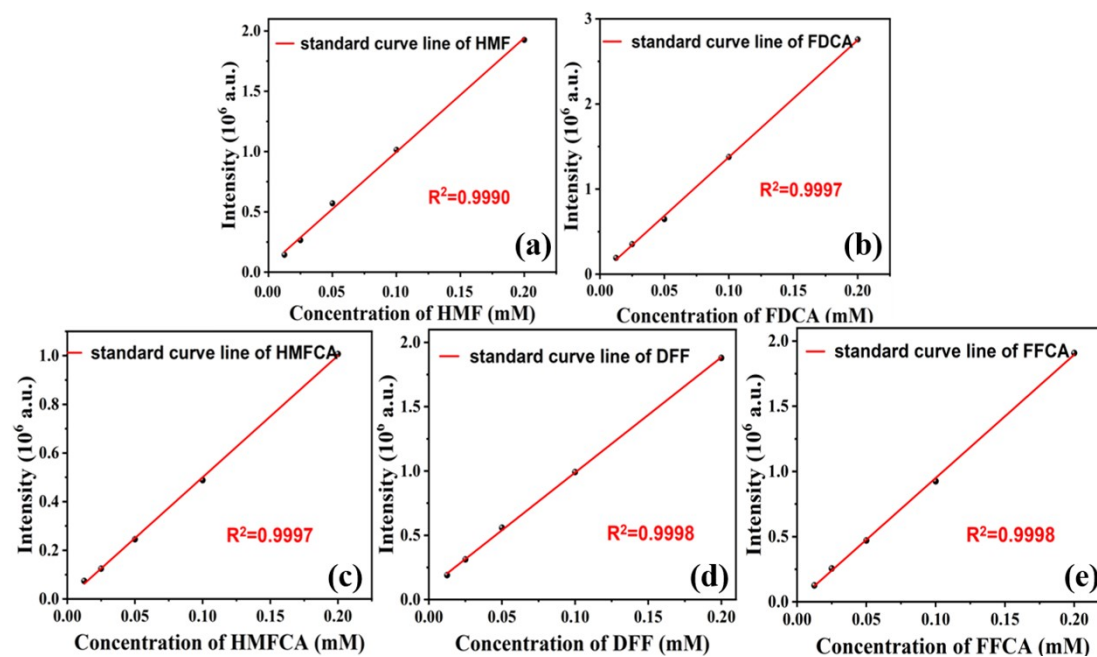

**Figure S8.** Calibration of the HPLC for (a)HMF, (b) FDCA, (c)HMFA, (d)DFF and (e)FFCA.
